# Supplementary material for: A polyhedral supramolecular system of endocyclic crystalline organic nanostructures: the case of triptycenes
Source: Royal Society of Chemistry journal article supplement (doi:10.1039/c4ce02379j), 2015-01-01
Supplement: c4ce02379j1.pdf [file c4ce02379j1.pdf]

## Supporting information

# Polyhedron Supramolecular System of Endocyclic Crystalline Organic Nanostructures: The Case of Triptycenes

*Su-Hui Yang,<sup>a</sup> Zong-Qiong Lin,<sup>a</sup> Nai-En Shi,<sup>\*, a</sup> Ling-Zhi Jin,<sup>a</sup> Meng-Na Yu,<sup>a</sup> Ling-Hai Xie,<sup>\*, a</sup> Ming-Dong Yi,<sup>a, b</sup> Wei Huang<sup>\*, b, a</sup>*

*<sup>a</sup> Key Laboratory for Organic Electronics and Information Displays & Institute of Advanced Materials(IAM), Jiangsu National Synergistic Innovation Center for Advanced Materials (SICAM), Nanjing University of Posts & Telecommunications, 9 Wenyuan Road, Nanjing 210023, China*

*<sup>b</sup> Key Laboratory of Flexible Electronics (KLOFE) & Institute of Advanced Materials (IAM), National Jiangsu Synergistic Innovation Center for Advanced Materials (SICAM), Nanjing Tech University (NanjingTech), 30 South Puzhu Road, Nanjing 211816, China*

*\*E-mail: iamlhxie@njupt.edu.cn (L.-H. Xie); iamneshi@njupt.edu.cn (N.-E. Shi) wei-huang@njtech.edu.cn (W. Huang)*

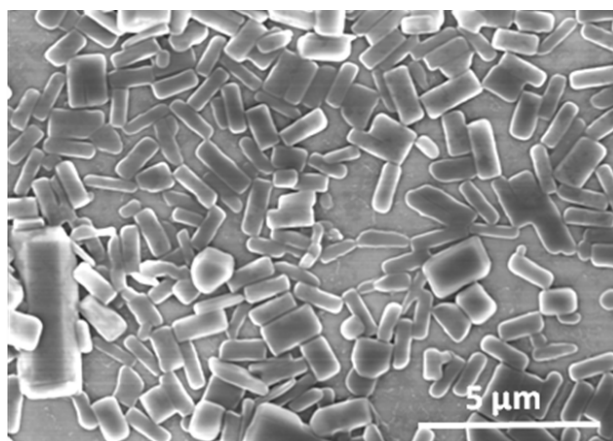

**Fig. S1** FESEM image of TPC crystals without any surfactants.

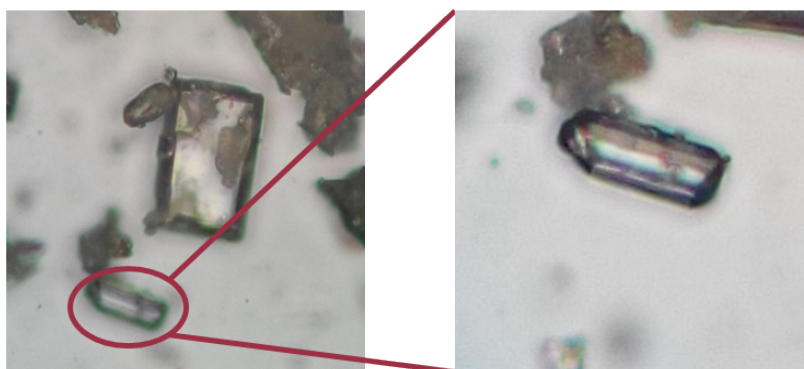

**Fig. S2** Optical microscope images for the TPC bulk crystals ( $\times 1000$ ).

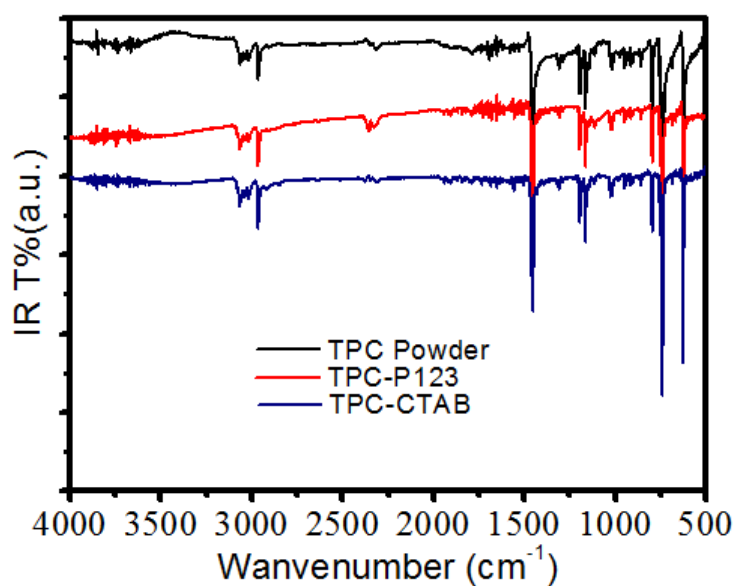

**Fig. S3** FT-IR spectra of TPC crystals prepared in the presence of P123 and CTAB.

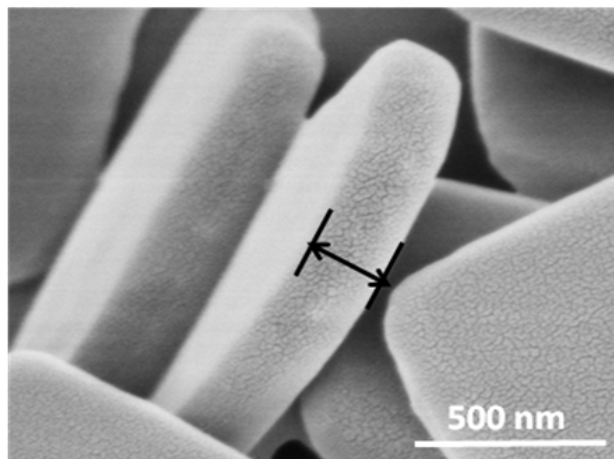

**Fig. S4** FESEM image of lateral side of the TPC nanosheets in the presence of CTAB.

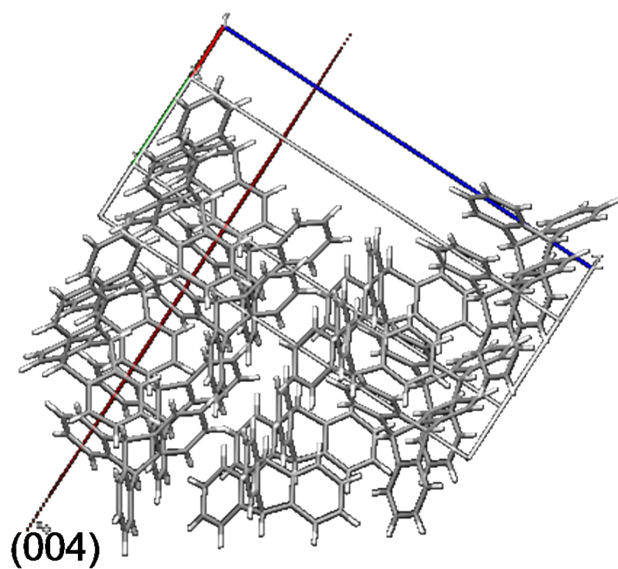

**Fig. S5** Molecular packing arrangement of TPC molecules along {004}s facets in the single crystal.

**Table S1** Electron Diffraction Analysis Report.

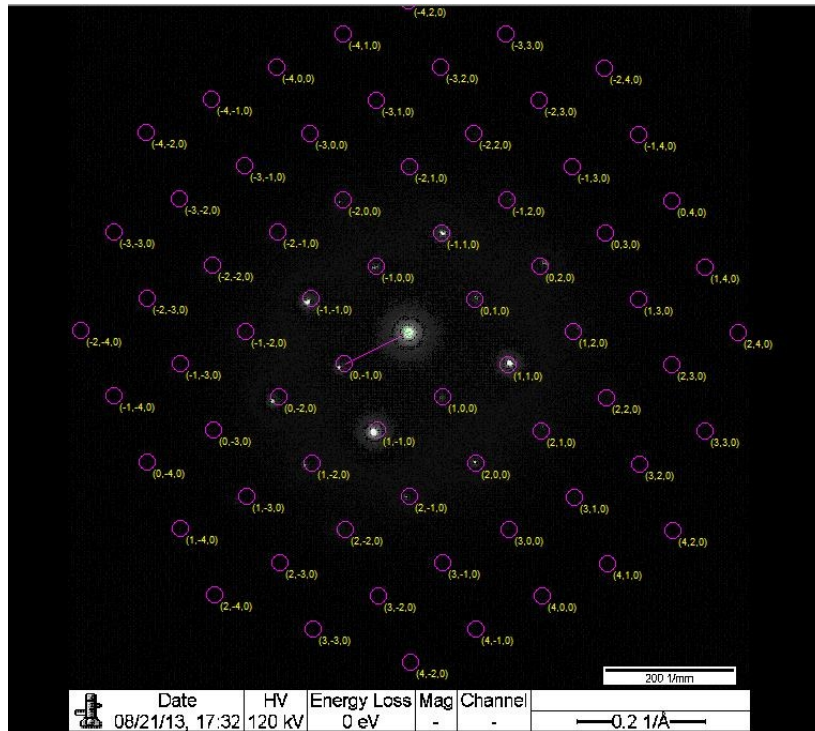

| $(hkl)_1$ | $(hkl)_2$ | <i>Reciprocal Vector Ratio</i> | <i>Reciprocal Vector Angle</i> |
|-----------|-----------|--------------------------------|--------------------------------|
| (-2 -2 0) | (0,-1,0)  | 2.844163                       | 45.316123                      |
| (-2 -1 0) | (0,-1,0)  | 2.255939                       | 63.687015                      |
| (-2 0 0)  | (0,-1,0)  | 2.022192                       | 90.000003                      |
| (-2 1 0)  | (0,-1,0)  | 2.255939                       | 116.312991                     |
| (-2 2 0)  | (0,-1,0)  | 2.844163                       | 134.683882                     |
| (-1 -2 0) | (0,-1,0)  | 2.241052                       | 26.818790                      |
| (-1 -1 0) | (0,-1,0)  | 1.422081                       | 45.316123                      |
| (-1 0 0)  | (0,-1,0)  | 1.011096                       | 90.000003                      |
| (-1 1 0)  | (0,-1,0)  | 1.422081                       | 134.683882                     |
| (-1 2 0)  | (0,-1,0)  | 2.241052                       | 153.181214                     |
| (0 -3 0)  | (0,-1,0)  | 3.000000                       | 0.000000                       |
| (0 -2 0)  | (0,-1,0)  | 2.000000                       | 0.000000                       |
| (0 -1 0)  | (0,-1,0)  | 1.000000                       | 0.000000                       |
| (0 1 0)   | (0,-1,0)  | 1.000000                       | -180.000000                    |
| (0 2 0)   | (0,-1,0)  | 2.000000                       | -180.000000                    |
| (0 3 0)   | (0,-1,0)  | 3.000000                       | -180.000000                    |
| (1 -2 0)  | (0,-1,0)  | 2.241052                       | -26.818789                     |
| (1 -1 0)  | (0,-1,0)  | 1.422081                       | -45.316121                     |
| (1 0 0)   | (0,-1,0)  | 1.011096                       | -90.000000                     |
| (1 1 0)   | (0,-1,0)  | 1.422081                       | -134.683880                    |
| (1 2 0)   | (0,-1,0)  | 2.241052                       | -153.181213                    |
| (2 -2 0)  | (0,-1,0)  | 2.844163                       | -45.316121                     |

|          |          |          |             |
|----------|----------|----------|-------------|
| (2 -1 0) | (0,-1,0) | 2.255939 | -63.687012  |
| (2 0 0)  | (0,-1,0) | 2.022192 | -90.000000  |
| (2 1 0)  | (0,-1,0) | 2.255939 | -116.312989 |
| (2 2 0)  | (0,-1,0) | 2.844163 | -134.683880 |

The  $d$  spacing of the above crystal facets.

| <b><i>(hkl)</i></b> | <b><i>D(hkl)</i></b> | <b><i>(hkl)</i></b> | <b><i>D(hkl)</i></b> |
|---------------------|----------------------|---------------------|----------------------|
| (-2, -2, 0)         | 2. 883450            | (2, -2, 0)          | 2. 883450            |
| (-2, -1, 0)         | 3. 635293            | (2, -1, 0)          | 3. 635293            |
| (-2, 0, 0)          | 4. 055500            | (2, 0, 0)           | 4. 055500            |
| (-2, 1, 0)          | 3. 635293            | (2, 1, 0)           | 3. 635293            |
| (-2, 2, 0)          | 2. 883450            | (2, 2, 0)           | 2. 883450            |
| (-1, -3, 0)         | 2. 590495            | (1, -3, 0)          | 2. 590495            |
| (-1, -2, 0)         | 3. 659442            | (1, -2, 0)          | 3. 659442            |
| (-1, -1, 0)         | 5. 766900            | (1, -1, 0)          | 5. 766899            |
| (-1, 0, 0)          | 8. 111000            | (1, 0, 0)           | 8. 111000            |
| (-1, 1, 0)          | 5. 766899            | (1, 1, 0)           | 5. 766900            |
| (-1, 2, 0)          | 3. 659442            | (1, 2, 0)           | 3. 659442            |
| (-1, 3, 0)          | 2. 590495            | (1, 3, 0)           | 2. 590495            |
| (0, -3, 0)          | 2. 733667            | (0, 1, 0)           | 8. 201000            |
| (0, -2, 0)          | 4. 100500            | (0, 2, 0)           | 4. 100500            |
| (0, -1, 0)          | 8. 201000            | (0, 3, 0)           | 2. 733667            |
